# Supplementary material for: Mechanistic insights into carbonic anhydrase IX inhibition by coumarins from Calendula officinalis: in vitro and in silico approaches
Source: Royal Society of Chemistry journal article supplement (doi:10.1039/d4ra05984k), 2024-01-01
Supplement: d4ra05984k1.pdf [file d4ra05984k1.pdf]

## Mechanistic insights into carbonic anhydrase IX inhibition by coumarins from

### *Calendula officinalis*: *in vitro* and *in silico* approaches

#### Authors and affiliations:

Reem S. Alruhaimi<sup>1#</sup>, Emadeldin M. Kamel<sup>2#</sup>, Sulaiman M. Alnasser<sup>3</sup>, Mohammed A.  
Alzoghaibi<sup>4</sup>, Al Mokhtar Lamsabhi<sup>5,6</sup>, Ayman M. Mahmoud<sup>7</sup> \*

#### Contents

|                                                                               |    |
|-------------------------------------------------------------------------------|----|
| Cartesian coordinates of DFT-optimized coumarins at the B3LYP level of theory | 1  |
| DFT optimized geometries of isolated coumarins at the B3LYP level of theory   | 11 |
| Molecular Docking Data                                                        | 12 |
| Spectral data of isolated coumarins                                           | 12 |

#### Cartesian coordinates of DFT-optimized geometries of isolated coumarins

### 6,7-di-O-glucopyranosyl esculetin

|   |          |          |          |
|---|----------|----------|----------|
| C | -8.25383 | 4.47979  | -0.15492 |
| C | -7.04713 | 4.92899  | 0.61158  |
| C | -5.93553 | 4.19609  | 0.71378  |
| C | -5.91443 | 2.90529  | 0.04358  |
| C | -7.03393 | 2.47549  | -0.67442 |
| O | -8.18553 | 3.20079  | -0.79832 |
| C | -7.01973 | 1.23739  | -1.32002 |
| C | -5.88903 | 0.42329  | -1.25202 |
| C | -4.77003 | 0.84719  | -0.53742 |
| C | -4.78173 | 2.08528  | 0.10928  |
| O | -9.24412 | 5.16775  | -0.22765 |
| O | -5.87862 | -0.77756 | -1.87963 |
| O | -3.67054 | 0.05814  | -0.46998 |
| C | -3.8677  | -1.13254 | -1.18344 |
| C | -2.54575 | -1.8837  | -1.27588 |
| O | -2.71802 | -3.01996 | -2.0789  |
| C | -2.07296 | -2.31654 | 0.10785  |
| O | -1.69439 | -1.18277 | 0.84056  |
| C | -3.18761 | -3.04446 | 0.85182  |
| O | -3.41684 | -4.28381 | 0.23775  |
| C | -4.47415 | -2.22942 | 0.82699  |
| O | -4.85211 | -1.92093 | -0.51472 |
| C | -4.25799 | -0.9323  | 1.59527  |
| O | -5.43808 | -0.17555 | 1.57738  |
| H | -7.07842 | 5.90748  | 1.11315  |
| H | -5.06668 | 4.55574  | 1.28452  |
| H | -7.90297 | 0.90299  | -1.884   |

|   |          |          |          |
|---|----------|----------|----------|
| H | -3.89716 | 2.41733  | 0.67255  |
| H | -4.22614 | -0.91206 | -2.21382 |
| H | -1.78084 | -1.20815 | -1.72008 |
| H | -1.8853  | -3.45891 | -2.11453 |
| H | -1.20773 | -3.00701 | -0.00784 |
| H | -1.40922 | -1.48558 | 1.68576  |
| H | -2.87605 | -3.18876 | 1.91053  |
| H | -4.10777 | -4.70482 | 0.72017  |
| H | -5.28554 | -2.8282  | 1.29802  |
| H | -3.43786 | -0.35101 | 1.1175   |
| H | -3.98345 | -1.16629 | 2.6482   |
| H | -5.26422 | 0.61434  | 2.0603   |
| C | -6.72456 | -1.00046 | -3.01083 |
| C | -7.9197  | -1.70431 | -2.86015 |
| C | -8.74466 | -1.92234 | -3.96338 |
| C | -7.18054 | -0.73131 | -5.36828 |
| C | -8.37518 | -1.43539 | -5.2178  |
| H | -8.87095 | -2.9805  | -4.05958 |
| H | -7.4278  | 0.22832  | -5.77187 |
| O | -6.35496 | -0.51415 | -4.2648  |
| H | -9.16404 | -0.79507 | -5.55335 |
| H | -8.50198 | -1.18545 | -2.12759 |
| C | -6.34277 | -1.47687 | -6.42367 |
| H | -6.87836 | -1.50477 | -7.34956 |
| H | -6.15557 | -2.47603 | -6.08968 |
| O | -5.09922 | -0.79659 | -6.61265 |
| H | -4.84058 | -0.85213 | -7.53548 |
| O | -8.32095 | -2.55451 | -6.10636 |

|   |           |          |          |
|---|-----------|----------|----------|
| H | -9.14071  | -2.60945 | -6.60293 |
| O | -10.02309 | -1.36216 | -3.65237 |
| H | -10.71266 | -1.98736 | -3.88736 |
| O | -7.58973  | -2.98634 | -2.31937 |
| H | -8.38954  | -3.50808 | -2.22086 |

**Aesculin**

|   |   |          |          |          |
|---|---|----------|----------|----------|
| C | 0 | -8.25383 | 4.47979  | -0.15492 |
| C | 0 | -7.04713 | 4.92899  | 0.61158  |
| C | 0 | -5.93553 | 4.19609  | 0.71378  |
| C | 0 | -5.91443 | 2.90529  | 0.04358  |
| C | 0 | -7.03393 | 2.47548  | -0.67442 |
| O | 0 | -8.18553 | 3.20079  | -0.79832 |
| C | 0 | -7.01973 | 1.23739  | -1.32002 |
| C | 0 | -5.88903 | 0.42329  | -1.25202 |
| C | 0 | -4.77003 | 0.84719  | -0.53742 |
| C | 0 | -4.78173 | 2.08528  | 0.10928  |
| O | 0 | -9.24412 | 5.16775  | -0.22765 |
| O | 0 | -5.87862 | -0.77756 | -1.87963 |
| O | 0 | -3.67054 | 0.05814  | -0.46998 |
| C | 0 | -3.8677  | -1.13254 | -1.18344 |
| C | 0 | -2.54575 | -1.8837  | -1.27588 |
| O | 0 | -2.71802 | -3.01996 | -2.0789  |
| C | 0 | -2.07296 | -2.31654 | 0.10785  |
| O | 0 | -1.69439 | -1.18277 | 0.84056  |
| C | 0 | -3.18761 | -3.04446 | 0.85182  |
| O | 0 | -3.41684 | -4.28381 | 0.23775  |
| C | 0 | -4.47415 | -2.22942 | 0.82699  |
| O | 0 | -4.85211 | -1.92093 | -0.51472 |

|   |   |          |          |          |
|---|---|----------|----------|----------|
| C | 0 | -4.25799 | -0.9323  | 1.59527  |
| O | 0 | -5.43808 | -0.17555 | 1.57738  |
| H | 0 | -7.07842 | 5.90748  | 1.11315  |
| H | 0 | -5.06668 | 4.55574  | 1.28452  |
| H | 0 | -7.90297 | 0.90299  | -1.884   |
| H | 0 | -3.89716 | 2.41733  | 0.67255  |
| H | 0 | -5.01469 | -1.19299 | -1.71891 |
| H | 0 | -4.22614 | -0.91206 | -2.21382 |
| H | 0 | -1.78084 | -1.20815 | -1.72008 |
| H | 0 | -1.8853  | -3.45891 | -2.11453 |
| H | 0 | -1.20773 | -3.00701 | -0.00784 |
| H | 0 | -1.40922 | -1.48558 | 1.68576  |
| H | 0 | -2.87605 | -3.18876 | 1.91053  |
| H | 0 | -4.10777 | -4.70482 | 0.72017  |
| H | 0 | -5.28554 | -2.8282  | 1.29802  |
| H | 0 | -3.43786 | -0.35101 | 1.1175   |
| H | 0 | -3.98345 | -1.16629 | 2.6482   |
| H | 0 | -5.26422 | 0.61434  | 2.0603   |

**Isobaisseoside**

|   |   |          |          |          |
|---|---|----------|----------|----------|
| C | 0 | -0.90001 | -0.00858 | -0.8776  |
| O | 0 | -2.50761 | 0.61645  | -2.55298 |
| C | 0 | -1.22123 | 0.02649  | -2.36593 |
| O | 0 | -1.38318 | -1.3524  | -4.30459 |
| C | 0 | -1.19322 | -1.39367 | -2.91613 |
| O | 0 | -1.9897  | -2.46068 | -0.93559 |
| C | 0 | -2.29518 | -2.2386  | -2.28576 |
| O | 0 | -4.0471  | -1.49646 | -3.72558 |
| C | 0 | -3.63988 | -1.52594 | -2.38434 |

|   |   |          |          |          |
|---|---|----------|----------|----------|
| C | 0 | -3.5331  | -0.09856 | -1.86352 |
| O | 0 | -7.06541 | 4.53259  | -0.97671 |
| C | 0 | -5.91381 | 3.80729  | -0.85281 |
| C | 0 | -5.89961 | 2.56919  | -1.49841 |
| O | 0 | -4.7585  | 0.55425  | -2.05802 |
| C | 0 | -4.76891 | 1.75509  | -1.43041 |
| O | 0 | -2.55041 | 1.38994  | -0.64837 |
| C | 0 | -3.64991 | 2.17899  | -0.71581 |
| C | 0 | -3.66161 | 3.41709  | -0.06911 |
| C | 0 | -4.79431 | 4.23709  | -0.13481 |
| C | 0 | -4.81541 | 5.52789  | 0.53539  |
| C | 0 | -5.92701 | 6.26079  | 0.43319  |
| O | 0 | -8.124   | 6.49956  | -0.40604 |
| C | 0 | -7.13371 | 5.81159  | -0.33331 |
| C | 0 | 2.71095  | -2.33382 | 2.63058  |
| O | 0 | 0.91804  | -1.83141 | 1.10907  |
| C | 0 | 1.29487  | -1.79238 | 2.4854   |
| O | 0 | 0.69007  | -2.4984  | 4.68125  |
| C | 0 | 0.3486   | -2.63735 | 3.32859  |
| O | 0 | -1.95187 | -3.1118  | 3.75068  |
| C | 0 | -1.09605 | -2.19138 | 3.12938  |
| O | 0 | -2.68913 | -1.51157 | 1.48835  |
| C | 0 | -1.43411 | -2.11676 | 1.64414  |
| C | 0 | -0.38966 | -1.30057 | 0.89378  |
| O | 0 | -0.67892 | -1.33401 | -0.47765 |
| H | 0 | 0.0144   | 0.59494  | -0.68164 |
| H | 0 | -1.75475 | 0.41427  | -0.30369 |
| H | 0 | -0.46605 | 0.6358   | -2.9111  |

|   |   |          |          |          |
|---|---|----------|----------|----------|
| H | 0 | -1.36037 | -2.24298 | -4.6107  |
| H | 0 | -0.2083  | -1.8518  | -2.67365 |
| H | 0 | -2.68785 | -2.98313 | -0.57921 |
| H | 0 | -2.36113 | -3.20714 | -2.83015 |
| H | 0 | -4.87701 | -1.05147 | -3.75007 |
| H | 0 | -4.38312 | -2.07753 | -1.76618 |
| H | 0 | -3.27922 | -0.13154 | -0.78036 |
| H | 0 | -6.78284 | 2.23479  | -2.06239 |
| H | 0 | -2.7307  | 0.5797   | -1.15413 |
| H | 0 | -2.77703 | 3.74914  | 0.49416  |
| H | 0 | -3.94656 | 5.88755  | 1.10613  |
| H | 0 | -5.9583  | 7.23928  | 0.93476  |
| H | 0 | 3.36828  | -1.5447  | 3.0595   |
| H | 0 | 2.70224  | -3.21712 | 3.30769  |
| H | 0 | 3.09702  | -2.63518 | 1.63112  |
| H | 0 | 1.24472  | -0.7385  | 2.8398   |
| H | 0 | 0.08796  | -3.03145 | 5.17184  |
| H | 0 | 0.44137  | -3.7007  | 3.01321  |
| H | 0 | -2.83171 | -2.80679 | 3.60852  |
| H | 0 | -1.22538 | -1.18125 | 3.57845  |
| H | 0 | -2.86582 | -1.48166 | 0.56355  |
| H | 0 | -1.44782 | -3.14902 | 1.22818  |
| H | 0 | -0.41658 | -0.25346 | 1.27008  |

**Skimmin**

|   |   |          |         |         |
|---|---|----------|---------|---------|
| C | 0 | -9.04893 | 4.29659 | 1.95119 |
| C | 0 | -7.84223 | 4.7458  | 2.71769 |
| C | 0 | -6.73063 | 4.0129  | 2.81989 |
| C | 0 | -6.70953 | 2.7221  | 2.14969 |

|   |   |           |          |          |
|---|---|-----------|----------|----------|
| C | 0 | -5.57683  | 1.9021   | 2.21539  |
| C | 0 | -5.56513  | 0.664    | 1.56869  |
| C | 0 | -6.68413  | 0.2401   | 0.85409  |
| C | 0 | -7.81483  | 1.05419  | 0.78609  |
| C | 0 | -7.82903  | 2.2923   | 1.43169  |
| O | 0 | -8.98063  | 3.0176   | 1.30779  |
| O | 0 | -10.03922 | 4.98456  | 1.87846  |
| O | 0 | -6.67372  | -0.96075 | 0.22648  |
| O | 0 | -4.42293  | -0.89863 | -0.26841 |
| C | 0 | -5.44832  | -1.61356 | 0.42099  |
| C | 0 | -5.5551   | -3.04102 | -0.09988 |
| C | 0 | -5.78156  | -3.04982 | -1.60793 |
| C | 0 | -4.74973  | -2.17341 | -2.31009 |
| C | 0 | -4.68728  | -0.79383 | -1.66747 |
| C | 0 | -6.02097  | -0.08739 | -1.87173 |
| O | 0 | -6.88947  | -0.92463 | -2.58611 |
| O | 0 | -3.49001  | -2.78158 | -2.21612 |
| O | 0 | -7.06587  | -2.55972 | -1.88351 |
| O | 0 | -4.36688  | -3.72621 | 0.19039  |
| H | 0 | -7.87352  | 5.72429  | 3.21926  |
| H | 0 | -5.86178  | 4.37256  | 3.39063  |
| H | 0 | -4.69225  | 2.23414  | 2.77866  |
| H | 0 | -4.67255  | 0.02344  | 1.62344  |
| H | 0 | -8.69806  | 0.7198   | 0.22211  |
| H | 0 | -5.19446  | -1.64653 | 1.50415  |
| H | 0 | -6.41939  | -3.5384  | 0.39448  |
| H | 0 | -5.67945  | -4.09364 | -1.98046 |
| H | 0 | -5.04521  | -2.05794 | -3.37692 |



|   |   |          |          |          |
|---|---|----------|----------|----------|
| H | 0 | -3.86496 | -0.21463 | -2.14402 |
| H | 0 | -5.85822 | 0.8529   | -2.44456 |
| H | 0 | -6.46868 | 0.15314  | -0.88155 |
| H | 0 | -7.6987  | -0.45405 | -2.69125 |
| H | 0 | -2.87945 | -2.21647 | -2.65797 |
| H | 0 | -7.17137 | -2.57904 | -2.81939 |
| H | 0 | -4.4667  | -4.60123 | -0.14387 |

**Xeroboside**

|   |          |          |          |
|---|----------|----------|----------|
| C | -6.8     | 7.46818  | 1.78691  |
| C | -5.5933  | 7.91738  | 2.55341  |
| C | -4.4817  | 7.18447  | 2.65561  |
| C | -4.4606  | 5.89367  | 1.98541  |
| C | -3.3279  | 5.07367  | 2.05111  |
| C | -3.3162  | 3.83558  | 1.40441  |
| C | -4.4352  | 3.41168  | 0.68981  |
| C | -5.5659  | 4.22578  | 0.62181  |
| C | -5.5801  | 5.46387  | 1.26741  |
| O | -6.7317  | 6.18918  | 1.14351  |
| O | -7.79029 | 8.15615  | 1.71419  |
| O | -2.2167  | 3.04653  | 1.47185  |
| O | -4.42479 | 2.21083  | 0.06221  |
| O | -3.4282  | 0.15211  | 0.35088  |
| C | -3.19938 | 1.55802  | 0.25671  |
| C | -2.27308 | 1.8775   | -0.90959 |
| C | -0.96509 | 1.10293  | -0.78792 |
| C | -1.23936 | -0.37959 | -0.55829 |
| C | -2.22261 | -0.57471 | 0.58855  |
| O | -0.03538 | -1.02675 | -0.2465  |

|   |          |          |          |
|---|----------|----------|----------|
| O | -0.22714 | 1.25693  | -1.97    |
| O | -1.99486 | 3.25162  | -0.91241 |
| C | -2.5505  | -2.05635 | 0.71806  |
| O | -1.84698 | -2.77828 | -0.25635 |
| O | -1.01165 | -4.90598 | 0.17167  |
| C | -2.18868 | -4.12736 | -0.08658 |
| C | -2.80223 | -4.67302 | -1.35773 |
| C | -2.41607 | -6.12826 | -1.2889  |
| C | -1.02926 | -6.05448 | -0.68798 |
| C | -2.3859  | -6.75903 | -2.67481 |
| O | -2.02339 | -8.10904 | -2.56678 |
| O | -3.31118 | -6.91817 | -0.55375 |
| O | -4.19531 | -4.5151  | -1.35964 |
| H | -5.62459 | 8.89587  | 3.05498  |
| H | -3.61285 | 7.54414  | 3.22636  |
| H | -2.44332 | 5.40572  | 2.61438  |
| H | -6.44913 | 3.89138  | 0.05784  |
| H | -2.77656 | 1.58257  | -1.85737 |
| H | -0.39136 | 1.50062  | 0.07894  |
| H | -1.68109 | -0.80932 | -1.4851  |
| H | -1.75699 | -0.19743 | 1.52643  |
| H | -0.24033 | -1.93622 | -0.11149 |
| H | 0.57051  | 0.76791  | -1.86054 |
| H | -1.42243 | 3.41361  | -1.64278 |
| H | -3.6437  | -2.20781 | 0.57402  |
| H | -2.25558 | -2.41436 | 1.7298   |
| H | -2.905   | -4.19149 | 0.76286  |
| H | -2.45534 | -4.15858 | -2.28174 |

|   |          |          |          |
|---|----------|----------|----------|
| H | -0.81693 | -6.97572 | -0.10061 |
| H | -0.25337 | -5.97188 | -1.48167 |
| H | -1.64268 | -6.22544 | -3.30859 |
| H | -3.39436 | -6.68189 | -3.13938 |
| H | -2.01616 | -8.46139 | -3.44037 |
| H | -3.3518  | -6.5515  | 0.31301  |
| H | -4.51032 | -4.87271 | -2.1722  |
| C | -2.51258 | 1.88195  | 2.24716  |
| H | -3.48694 | 1.52125  | 1.99138  |
| H | -1.78633 | 1.12326  | 2.04254  |
| H | -2.48585 | 2.12992  | 3.28769  |
| H | -2.7548  | 1.90506  | 1.166    |

### DFT-optimized geometries of isolated coumarins

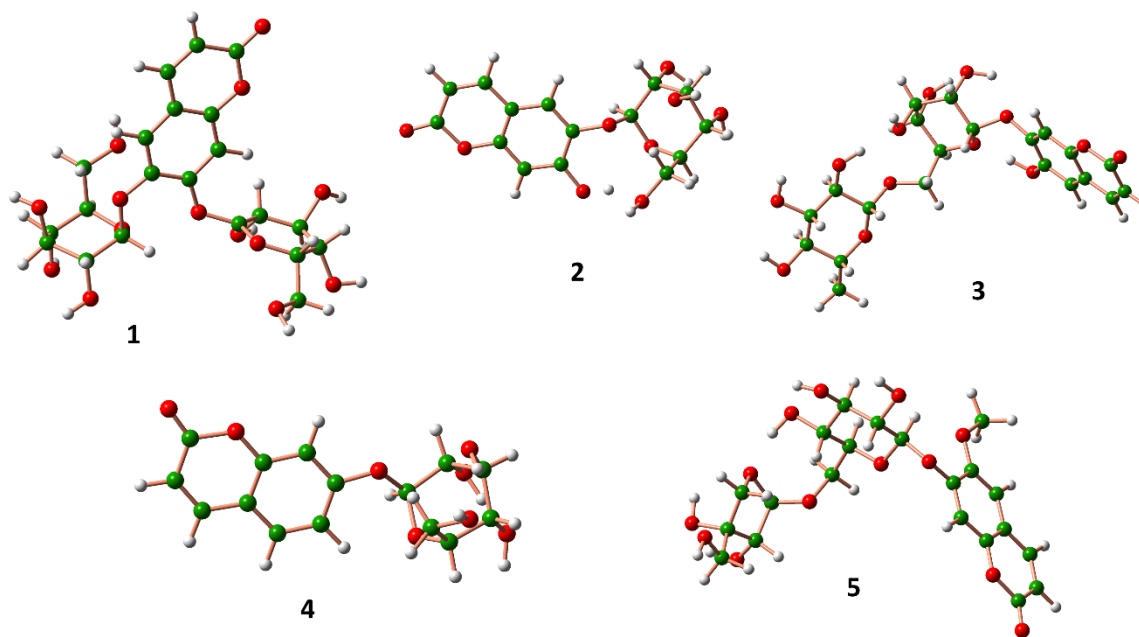

Figure S1. DFT optimized geometries of isolated coumarins.

### Molecular docking data

The dimensions of the grid box are center\_x = 13.955, center\_y = -24.907, and center\_z = 59.633; size\_x = 30, size\_y = 30, and size\_z = 28, spacing 0.375.

### **Spectral data of isolated coumarins**

#### **6,7-di-O-glucopyranosyl esculetin**

<sup>1</sup>H NMR (DMSO-d<sub>6</sub>, 500 MHz): δ (ppm) 7.92 (d, J = 8.5 Hz, 1H, H-3 of esculetin), 7.53 (d, J = 8.5 Hz, 1H, H-4 of esculetin), 6.96 (s, 1H, H-6 of esculetin), 5.30 (d, J = 7.8 Hz, 1H, H-1' of Glc), 5.01 (d, J = 7.8 Hz, 1H, H-1" of Glc), 4.21 - 3.00 (m, H-2' to H-6' of Glc and H-2" to H-6" of Glc). <sup>13</sup>C NMR (DMSO-d<sub>6</sub>, 125 MHz): δ (ppm) 162.0 (C-1 of esculetin), 150.0 (C-2 of esculetin), 114.0 (C-3 of esculetin), 145.0 (C-4 of esculetin), 117.0 (C-5 of esculetin), 156.5 (C-6 of esculetin), 104.0 (C-1' of Glc), 77.0 - 60.0 (C-2' to C-6' of Glc and C-1" to C-6" of Glc).

#### **Aesculin**

<sup>1</sup>H NMR (DMSO-d<sub>6</sub>, 500 MHz): δ (ppm) 7.89 (d, J = 8.6 Hz, 1H, H-3 of coumarin), 7.47 (d, J = 8.6 Hz, 1H, H-4 of coumarin), 6.91 (s, 1H, H-6 of coumarin), 5.31 (d, J = 7.5 Hz, 1H, H-1' of Glc), 5.04 (d, J = 7.5 Hz, 1H, H-1" of Glc), 4.27 - 3.25 (m, H-2' to H-6' of Glc). <sup>13</sup>C NMR (DMSO-d<sub>6</sub>, 125 MHz): δ (ppm) 161.5 (C-1 of coumarin), 150.2 (C-2 of coumarin), 115.0 (C-3 of coumarin), 145.0 (C-4 of coumarin), 116.7 (C-5 of coumarin), 157.0 (C-6 of coumarin), 103.0 (C-1' of Glc), 77.0 - 62.0 (C-2' to C-6' of Glc).

#### **Isobaisseoside**

<sup>1</sup>H NMR (DMSO-d<sub>6</sub>, 400 MHz): δ (ppm) 7.70 (s, 1H, H-4 of coumarin), 7.58 (d, J = 9.5 Hz, 1H, H-3 of coumarin), 7.20 (s, 1H, H-5 of coumarin), 5.12 (d, J = 7.9 Hz, 1H, H-1' of GlcA), 4.89 (d, J = 7.7 Hz, 1H, H-1" of Rha), 4.18-3.02 (m, H-2' to H-6' of GlcA, H-2" to H-5" of Rha), 1.16 (d, J = 6.0 Hz, 3H, H-6" of Rha, methyl group). <sup>13</sup>C NMR (DMSO-d<sub>6</sub>, 100 MHz): δ (ppm) 160.2 (C-1 of coumarin), 153.8 (C-2 of coumarin), 112.0 (C-3 of coumarin), 144.0 (C-4 of coumarin), 118.1 (C-5 of coumarin), 152.5 (C-6 of coumarin), 143.9 (C-7 of coumarin), 112.9 (C-8 of coumarin), 148.5 (C-9 of coumarin), 112.2 (C-10 of coumarin), 103.5 (C-1' of GlcA), 103.2 (C-1" of Rha), 74.9-60.7 (C-2' to C-6' of GlcA, C-2" to C-5" of Rha), 17.9 (C-6" of Rha, methyl group).

#### **Skimmin**



Figure S1.  $^1\text{H-NMR}$  ( $\text{DMSO-d}_6$ ) spectrum of compound **1**.

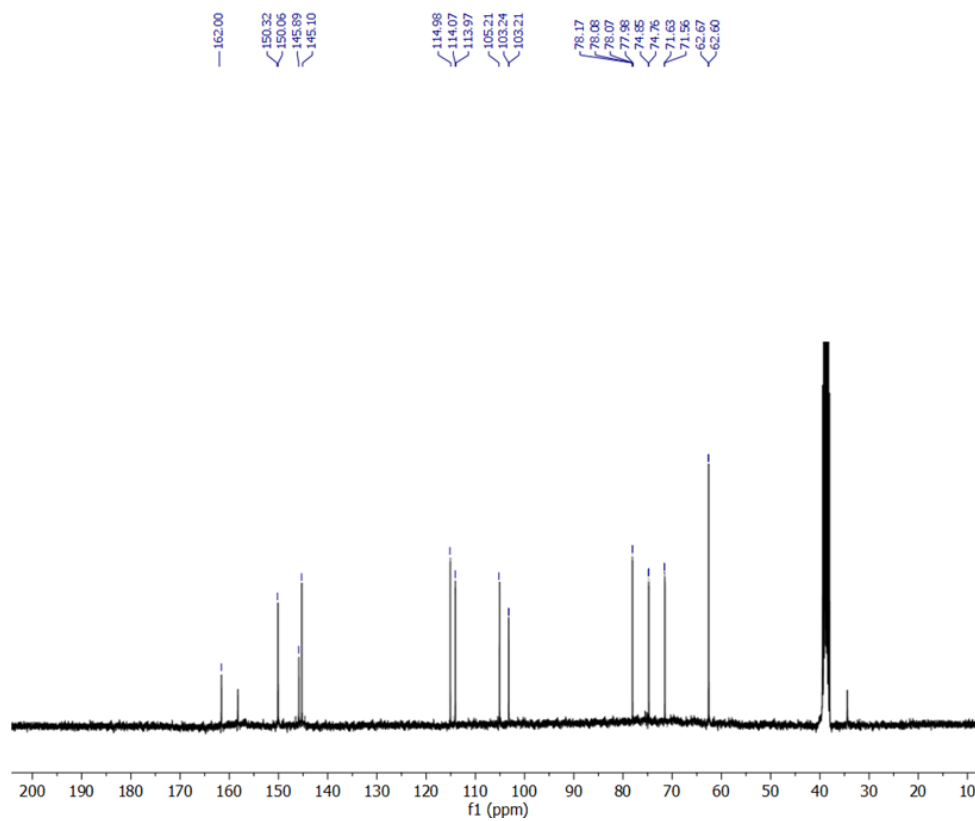

Figure S2.  $^{13}\text{C-NMR}$  ( $\text{DMSO-d}_6$ ) spectrum of compound **1**.

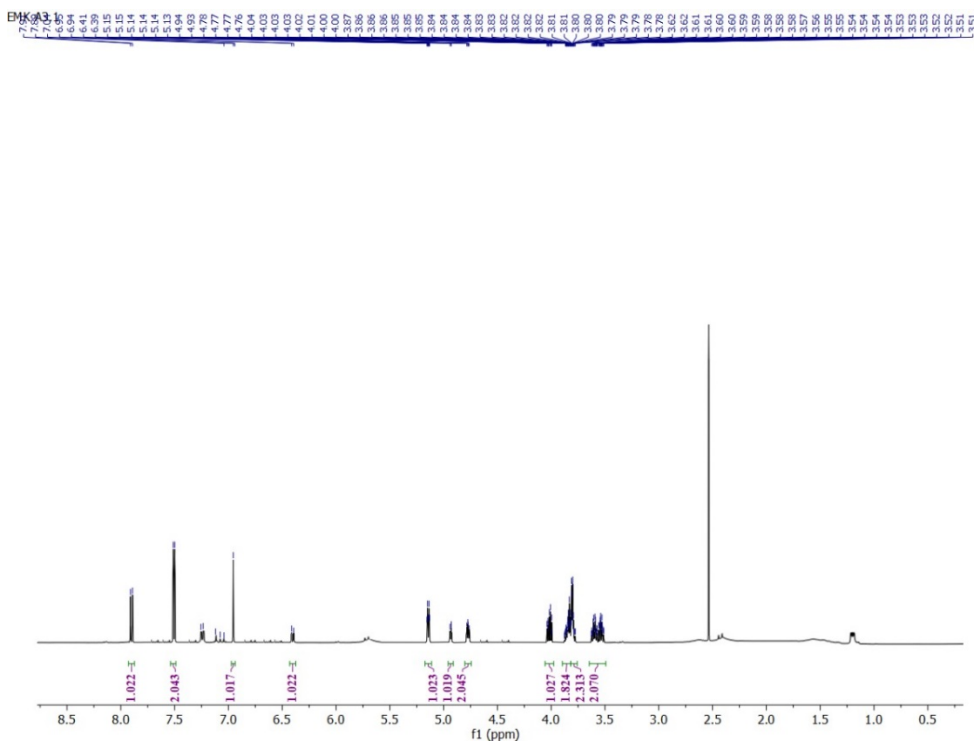

Figure S3.  $^1\text{H-NMR}$  ( $\text{DMSO-d}_6$ ) spectrum of compound **2**.

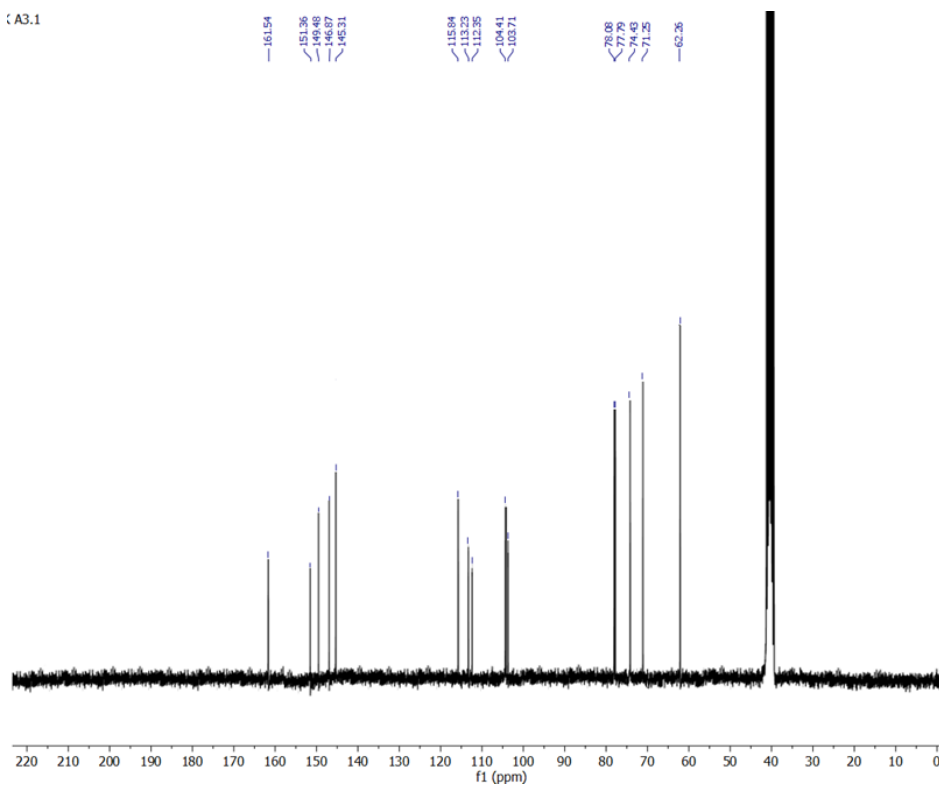

Figure S4.  $^{13}\text{C-NMR}$  ( $\text{DMSO-d}_6$ ) spectrum of compound **2**.

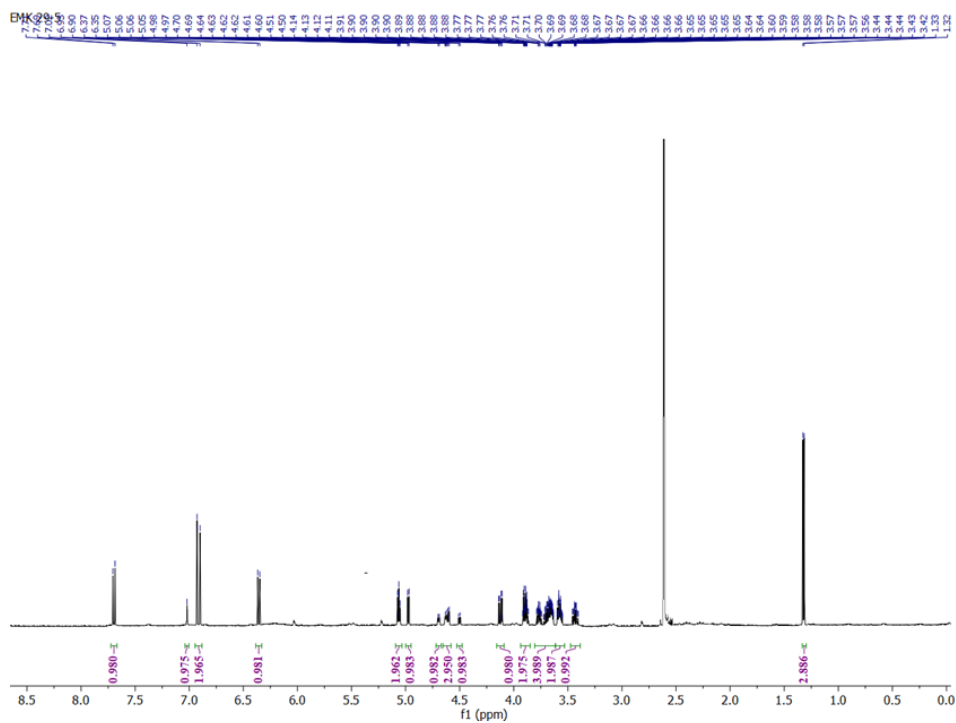

Figure S5.  $^1\text{H-NMR}$  ( $\text{DMSO-d}_6$ ) spectrum of compound **3**.

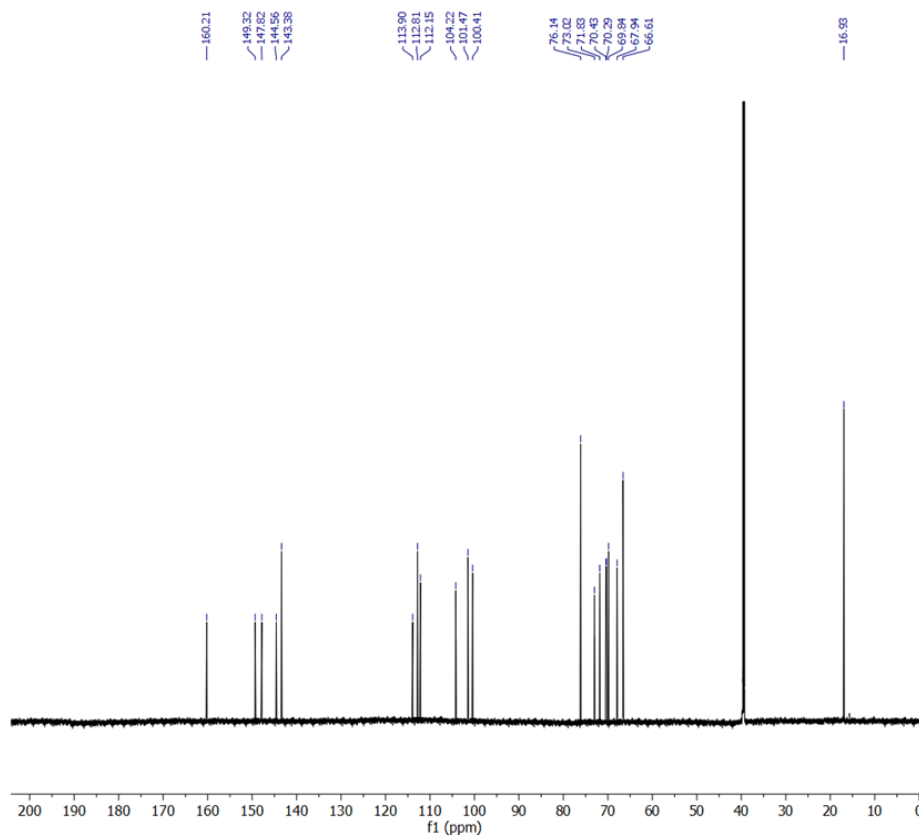

Figure S6.  $^{13}\text{C}$ -NMR (DMSO- $d_6$ ) spectrum of compound **3**.

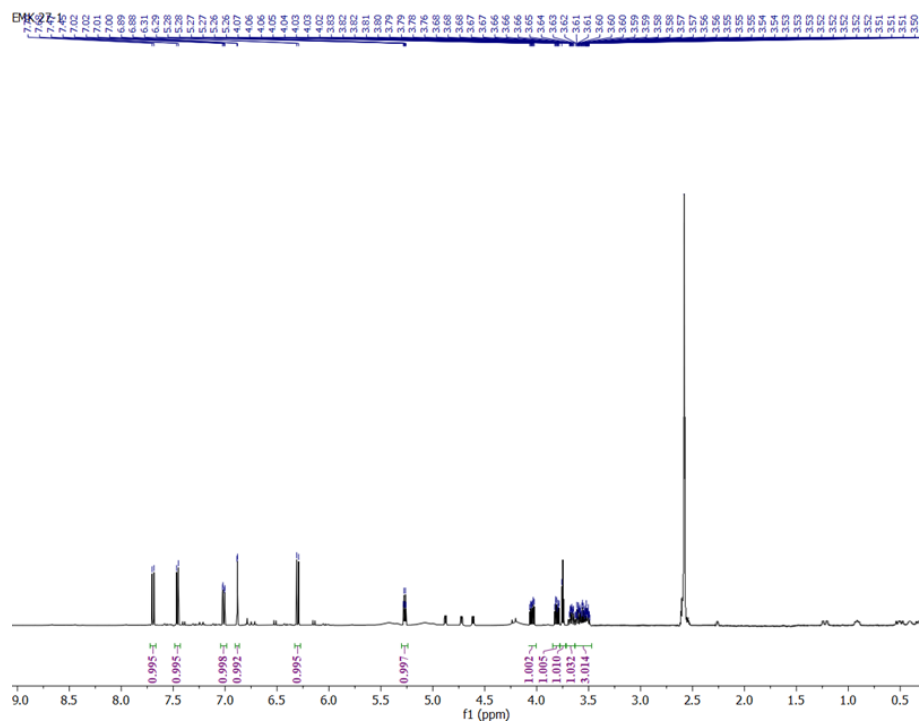

Figure S7.  $^1\text{H}$ -NMR (DMSO- $d_6$ ) spectrum of compound **4**.



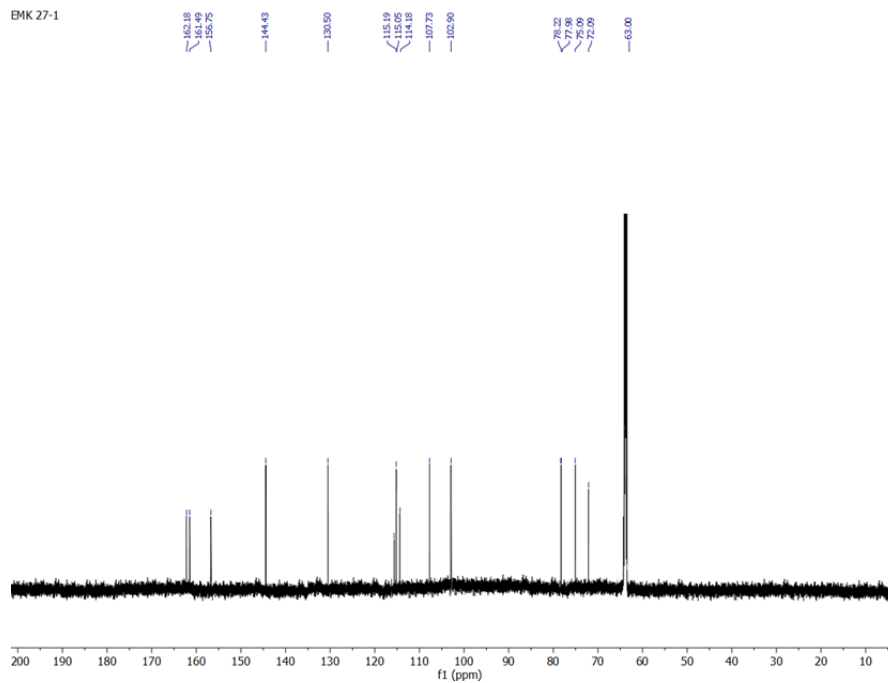

Figure S8.  $^{13}\text{C}$ -NMR ( $\text{DMSO}-d_6$ ) spectrum of compound 4.

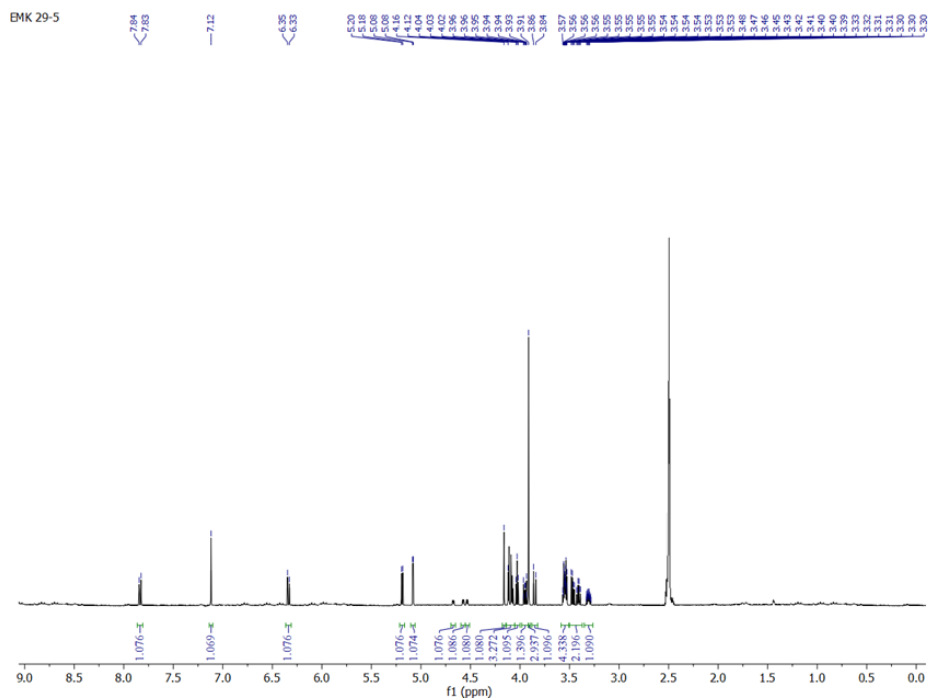

Figure S9.  $^1\text{H}$ -NMR ( $\text{DMSO}-d_6$ ) spectrum of compound 5.

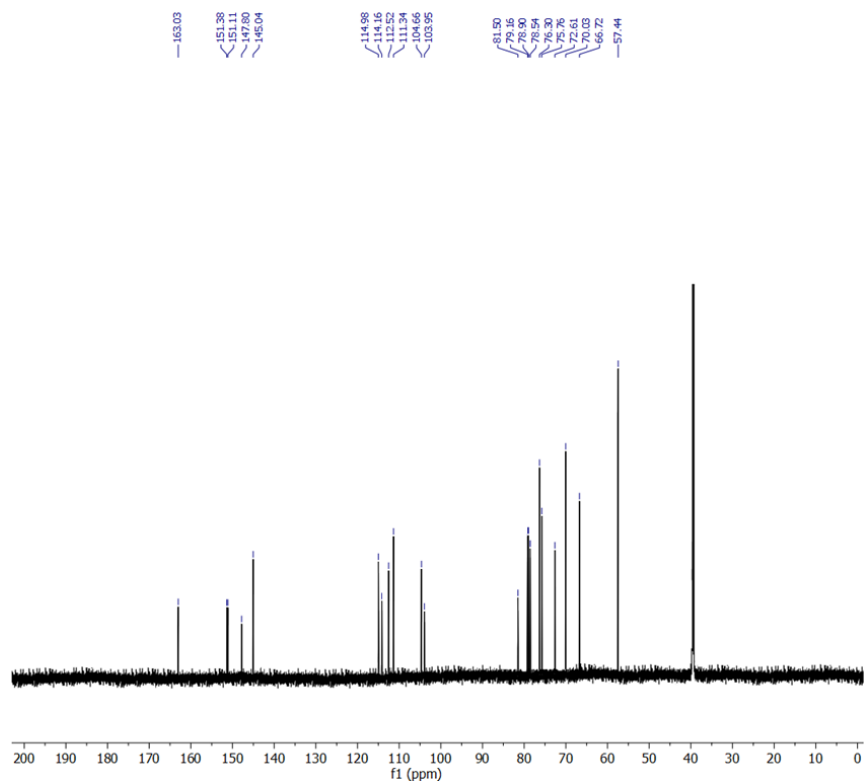

Figure S10.  $^{13}\text{C}$ -NMR ( $\text{DMSO}-d_6$ ) spectrum of compound **5**.
